# Supplementary material
Source: PubMed Central journal article supplement (PMC6546224)
Supplement: ajcn113050supplementarydata1.pdf [file ajcn113050supplementarydata1.pdf]

## Online Supplemental Material

### Supplemental Table 1

Two-by-two table showing classification of true positives, false negatives, false positives, and true negatives using serum retinol (SR) concentration ( $\mu\text{mol/L}$ ) as the test of vitamin A deficiency (VAD) and total liver reserves (TLR) estimated with retinol isotope dilution (RID) as true VAD, which were used to calculate sensitivity and specificity.

|             |                  | "True" VAD                                          |                     |                     |
|-------------|------------------|-----------------------------------------------------|---------------------|---------------------|
|             |                  | Total liver reserves ( $\mu\text{mol/g}$ ) from RID |                     |                     |
|             |                  | VA deficient (+)                                    | VA replete (-)      |                     |
|             |                  | TLR < 0.1                                           | TLR $\geq$ 0.1      |                     |
| Test of VAD | VA deficient (+) | SR < 0.7                                            | True positive (TP)  | False positive (FP) |
|             | VA replete (-)   | SR $\geq$ 0.7                                       | False negative (FN) | True negative (TN)  |
|             |                  | Sensitivity =                                       |                     | Specificity =       |
|             |                  | TP / (TP + FN)                                      |                     | TN / (TN + FP)      |
